# Supplementary material for: Attention-related modulation of caudate neurons depends on superior colliculus activity
Source: eLife journal article supplement (doi:10.7554/elife.53998), 2020-09-17

Same-side SC  
inactivations

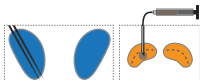

Opposite-side SC  
inactivations

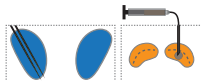

monkey R

Before

During

During minus Before

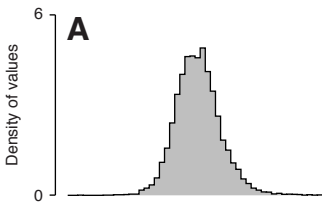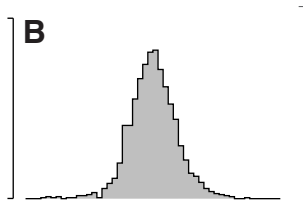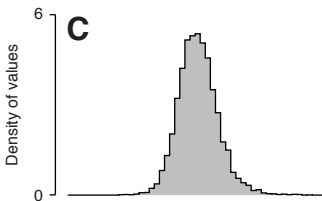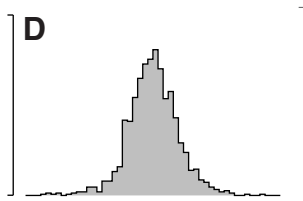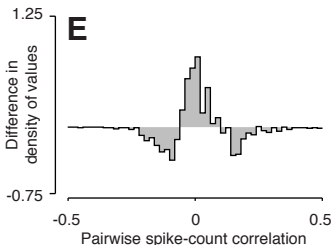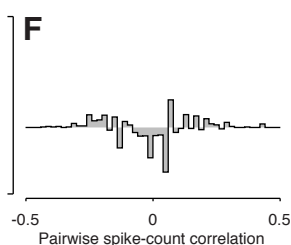

Supplement: supp [file elife_poa_e53998_Figure_5_figure_supplement_2.pdf › elife_poa_e53998_Figure_5_figure_supplement_2.pdf]
