# Supplementary figures and images for: Attention-related modulation of caudate neurons depends on superior colliculus activity
Source: eLife journal article supplement (doi:10.7554/elife.53998), 2020-09-17

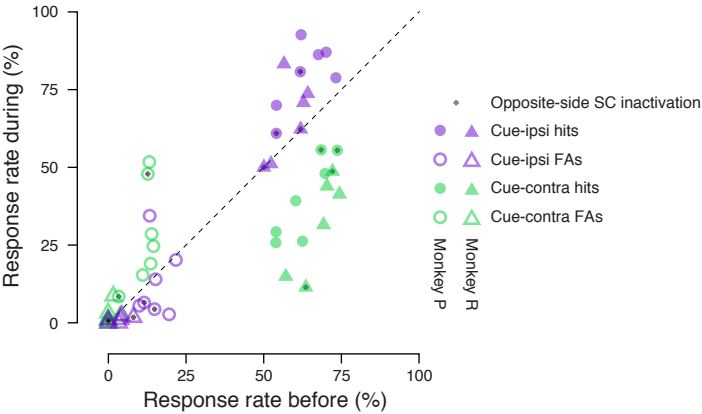

Supplement: supp [file elife_poa_e53998_Figure_1_figure_supplement_1.pdf › elife_poa_e53998_Figure_1_figure_supplement_1.pdf]

## Same-side SC inactivations

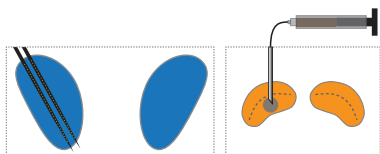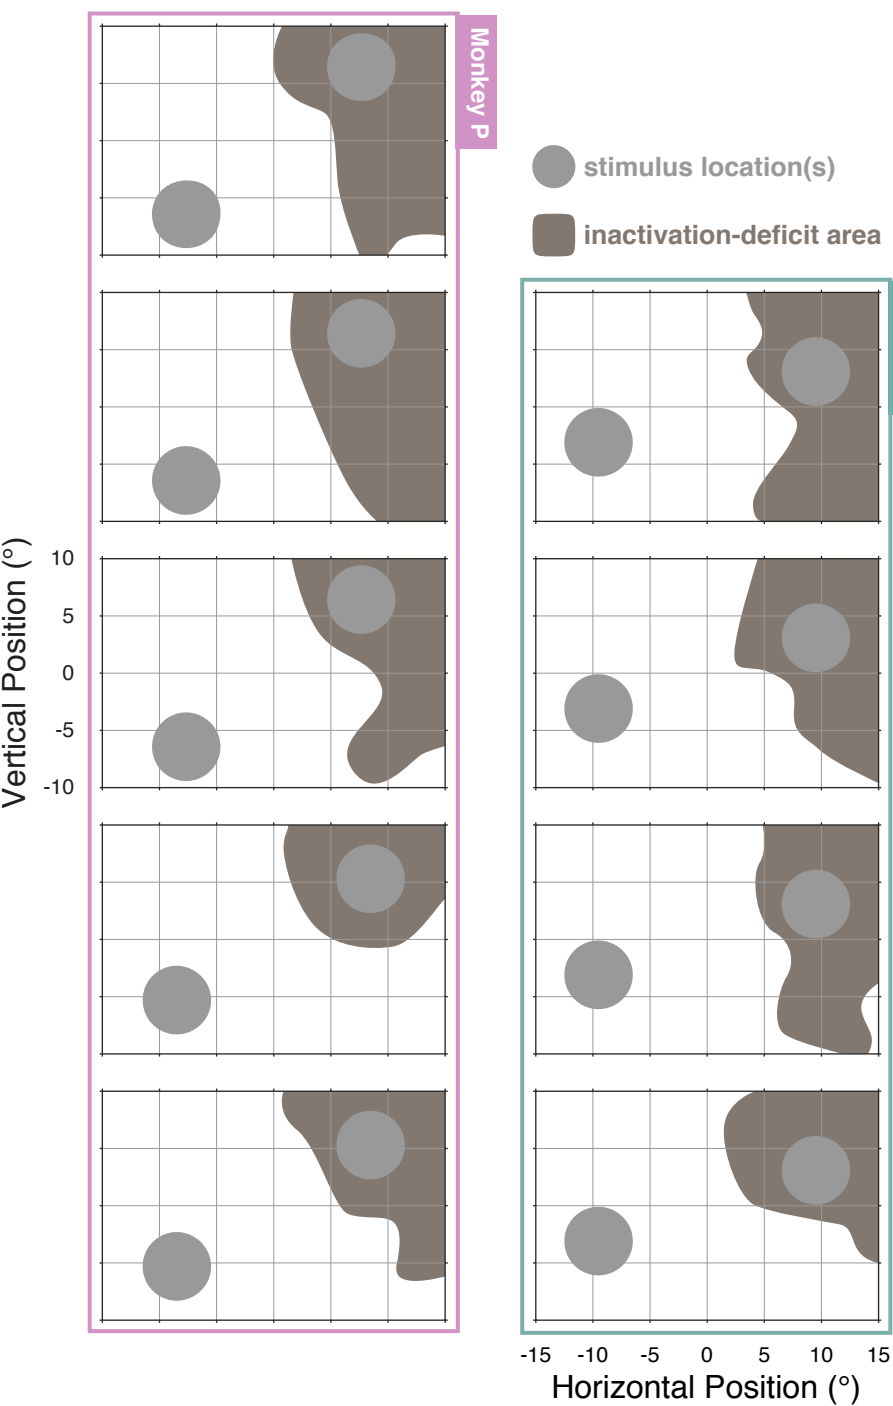

## Opposite-side SC inactivations

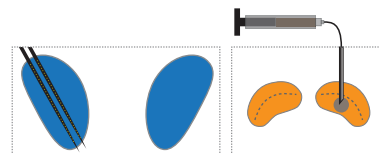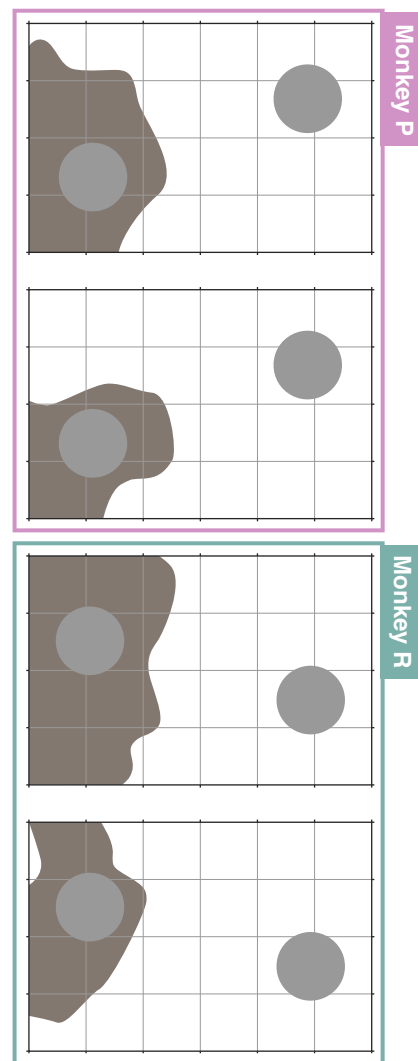

Supplement: supp [file elife_poa_e53998_Figure_1_figure_supplement_2.pdf › elife_poa_e53998_Figure_1_figure_supplement_2.pdf]

monkey P

monkey R

**A** AC + 5

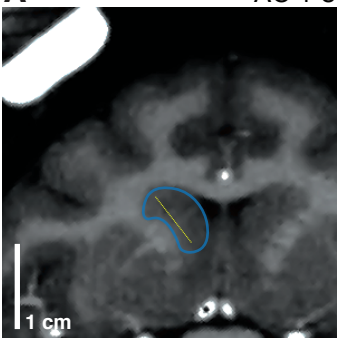

**B** AC + 2

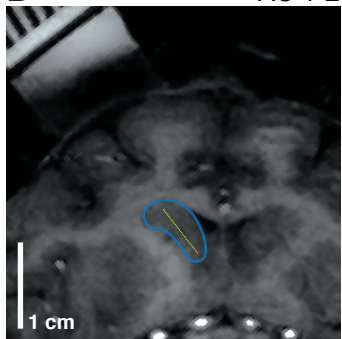

**C** AC + 6

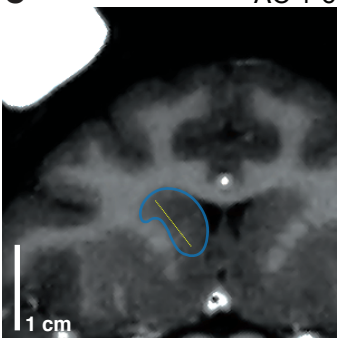

**D** AC + 4

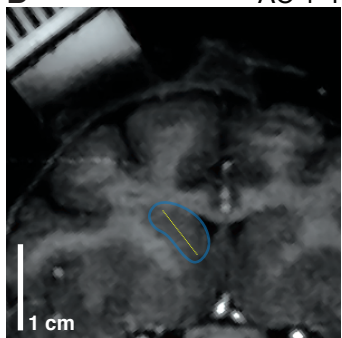

**E** AC + 8

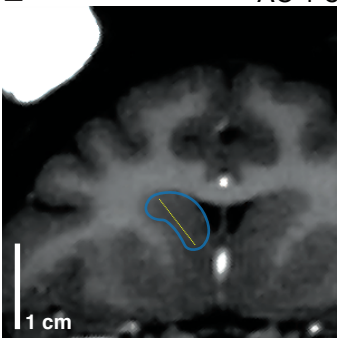

Supplement: supp [file elife_poa_e53998_Figure_1_figure_supplement_3.pdf › elife_poa_e53998_Figure_1_figure_supplement_3.pdf]

# Same-side SC inactivations

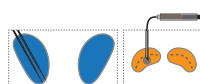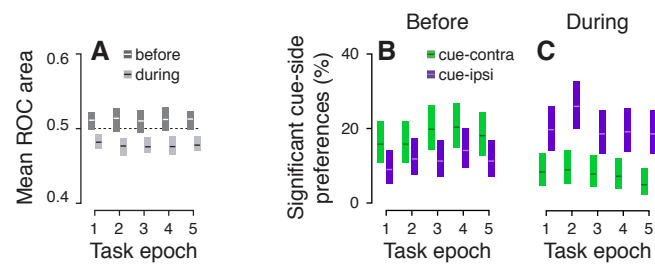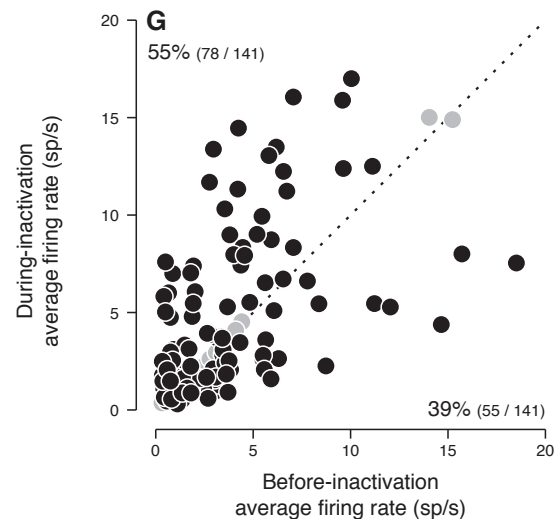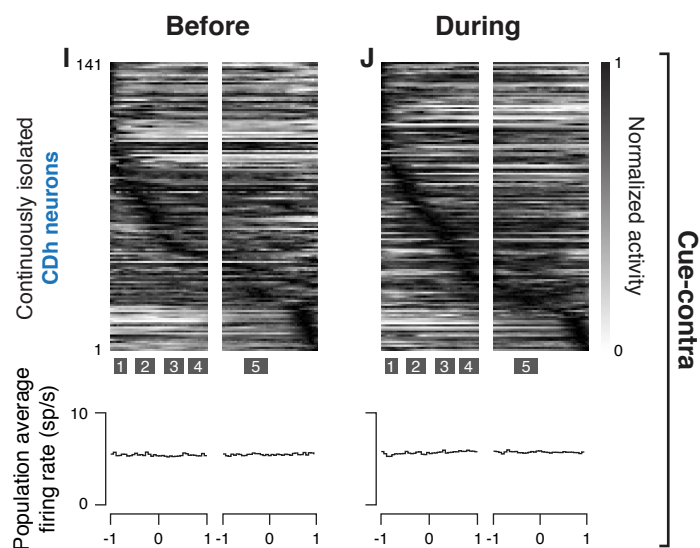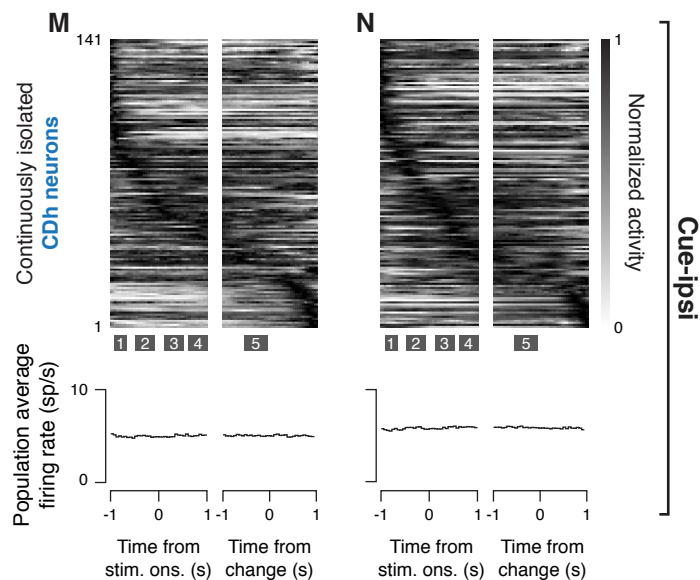

# Opposite-side SC inactivations

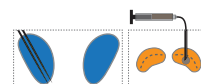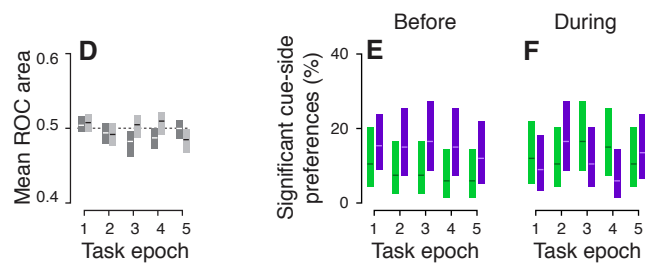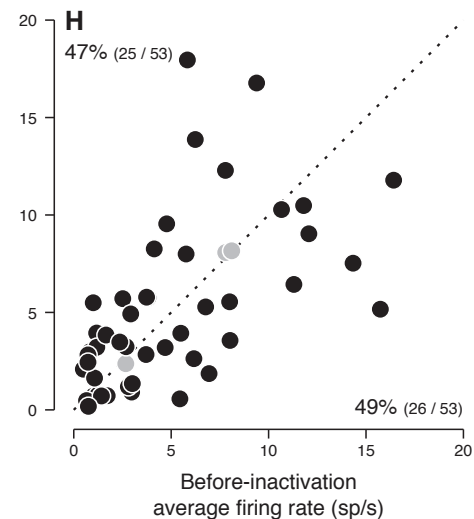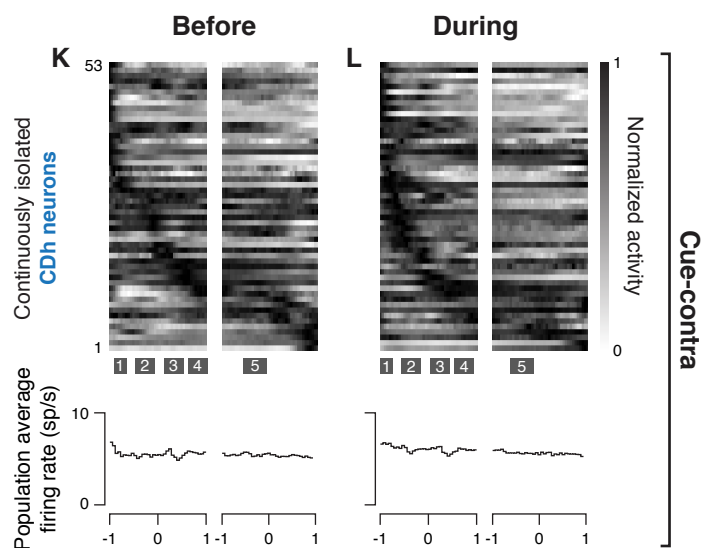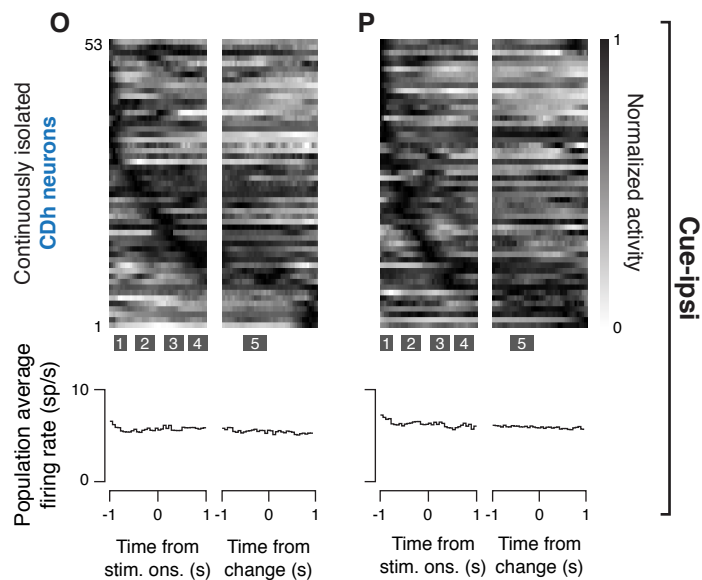

Supplement: supp [file elife_poa_e53998_Figure_3_figure_supplement_1.pdf › elife_poa_e53998_Figure_3_figure_supplement_1.pdf]

# Opposite-side SC

inactivations

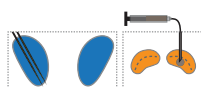

Before

During

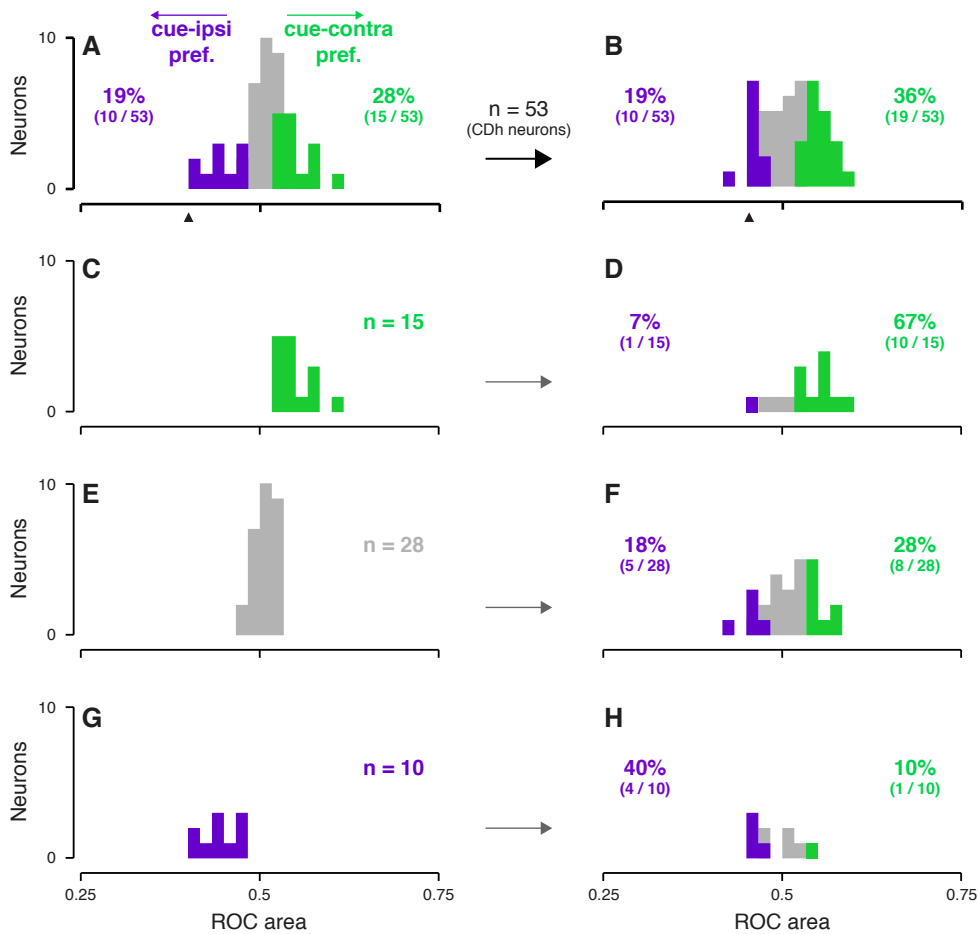

Supplement: supp [file elife_poa_e53998_Figure_3_figure_supplement_2.pdf › elife_poa_e53998_Figure_3_figure_supplement_2.pdf]

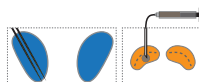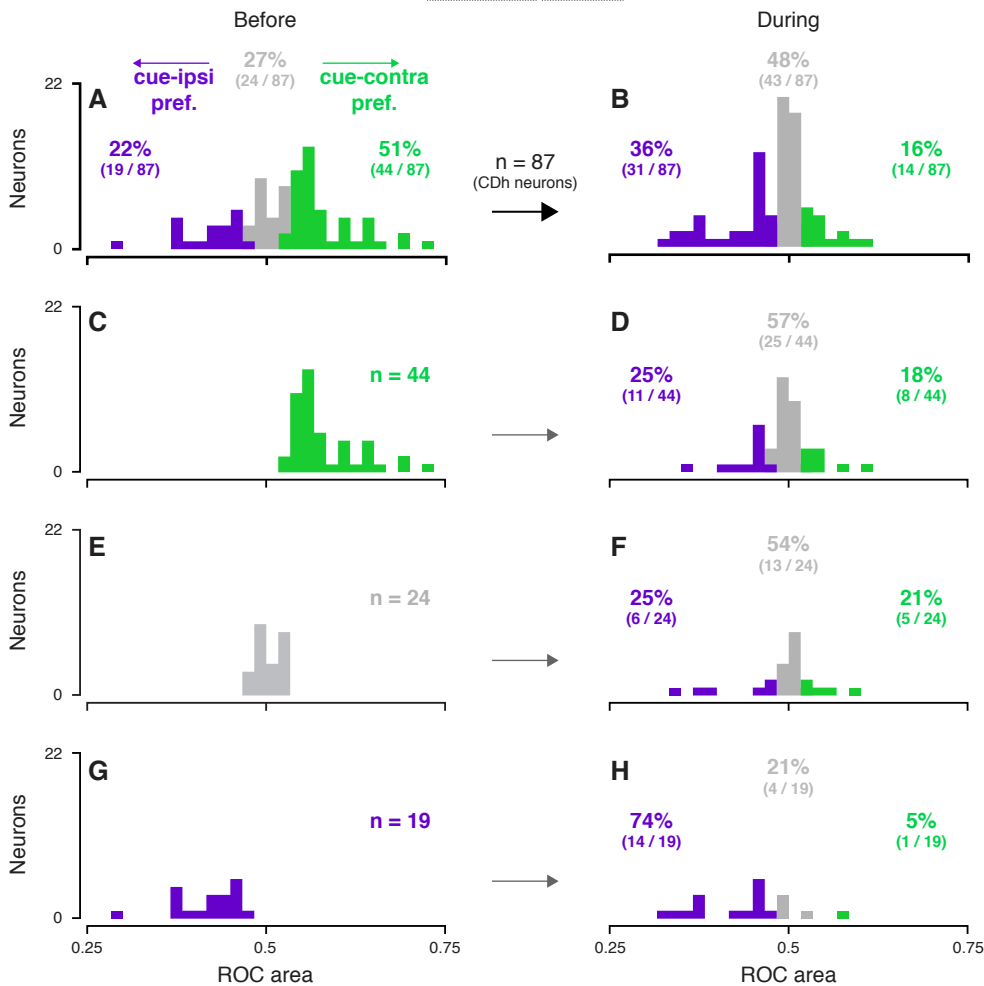

Supplement: supp [file elife_poa_e53998_Figure_3_figure_supplement_3.pdf › elife_poa_e53998_Figure_3_figure_supplement_3.pdf]

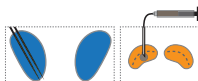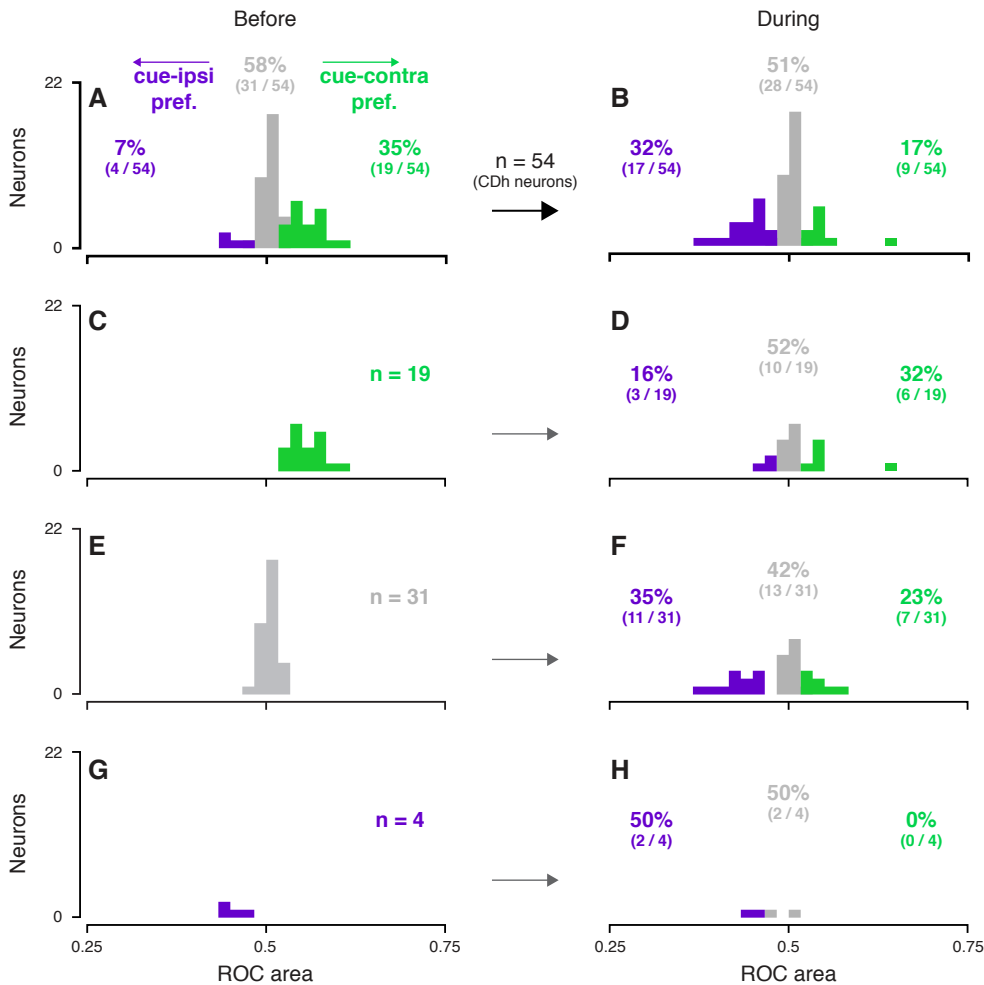

Supplement: supp [file elife_poa_e53998_Figure_3_figure_supplement_4.pdf › elife_poa_e53998_Figure_3_figure_supplement_4.pdf]

# Same-side SC inactivations

monkey P

# Opposite-side SC inactivations

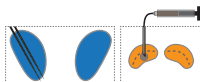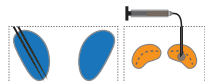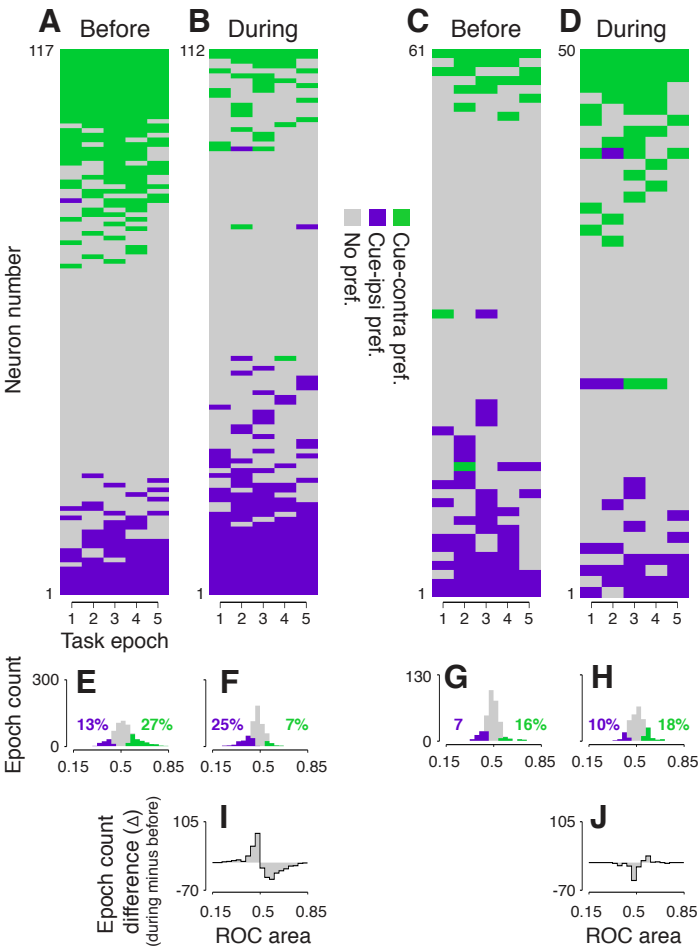

Supplement: supp [file elife_poa_e53998_Figure_4_figure_supplement_1.pdf › elife_poa_e53998_Figure_4_figure_supplement_1.pdf]

# Same-side SC inactivations

monkey R

# Opposite-side SC inactivations

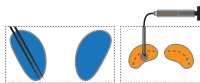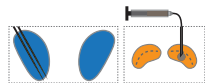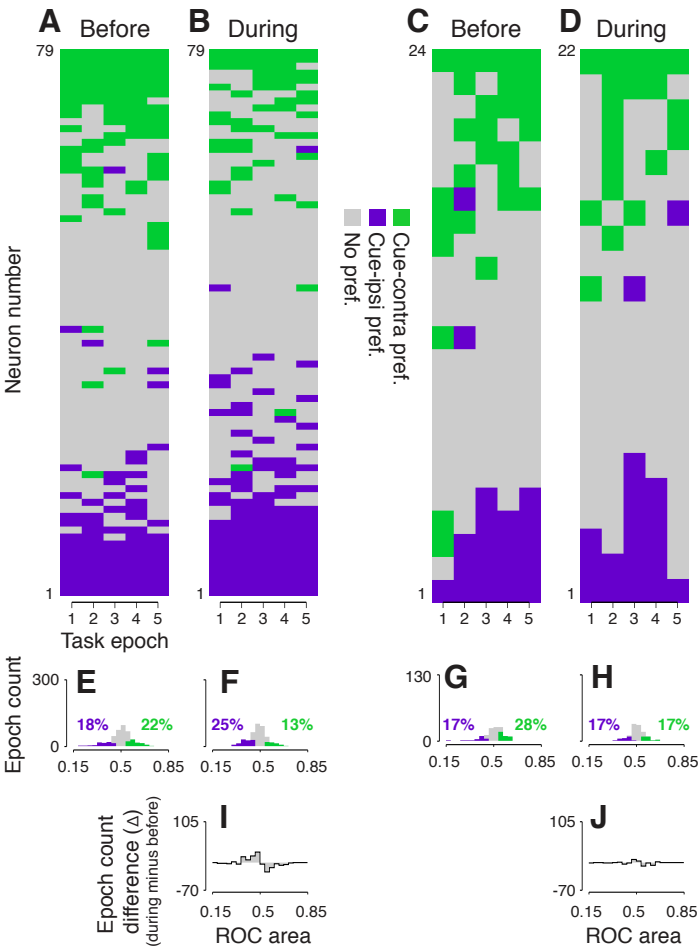

Supplement: supp [file elife_poa_e53998_Figure_4_figure_supplement_2.pdf › elife_poa_e53998_Figure_4_figure_supplement_2.pdf]

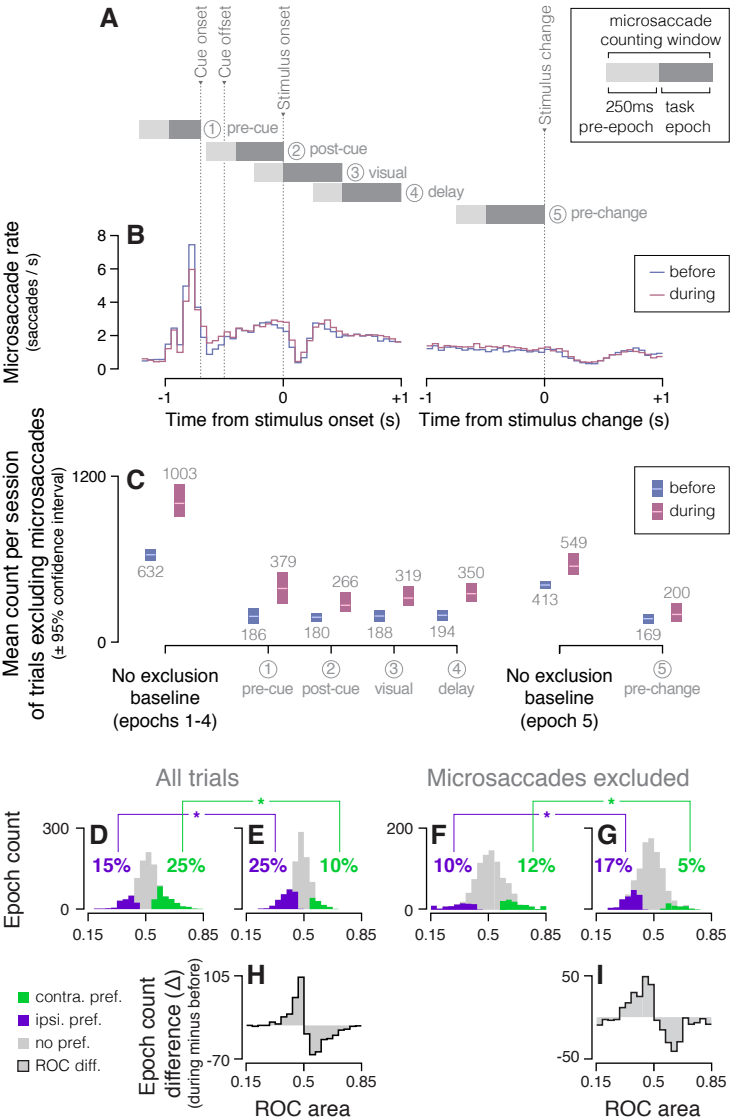

Supplement: supp [file elife_poa_e53998_Figure_4_figure_supplement_3.pdf › elife_poa_e53998_Figure_4_figure_supplement_3.pdf]

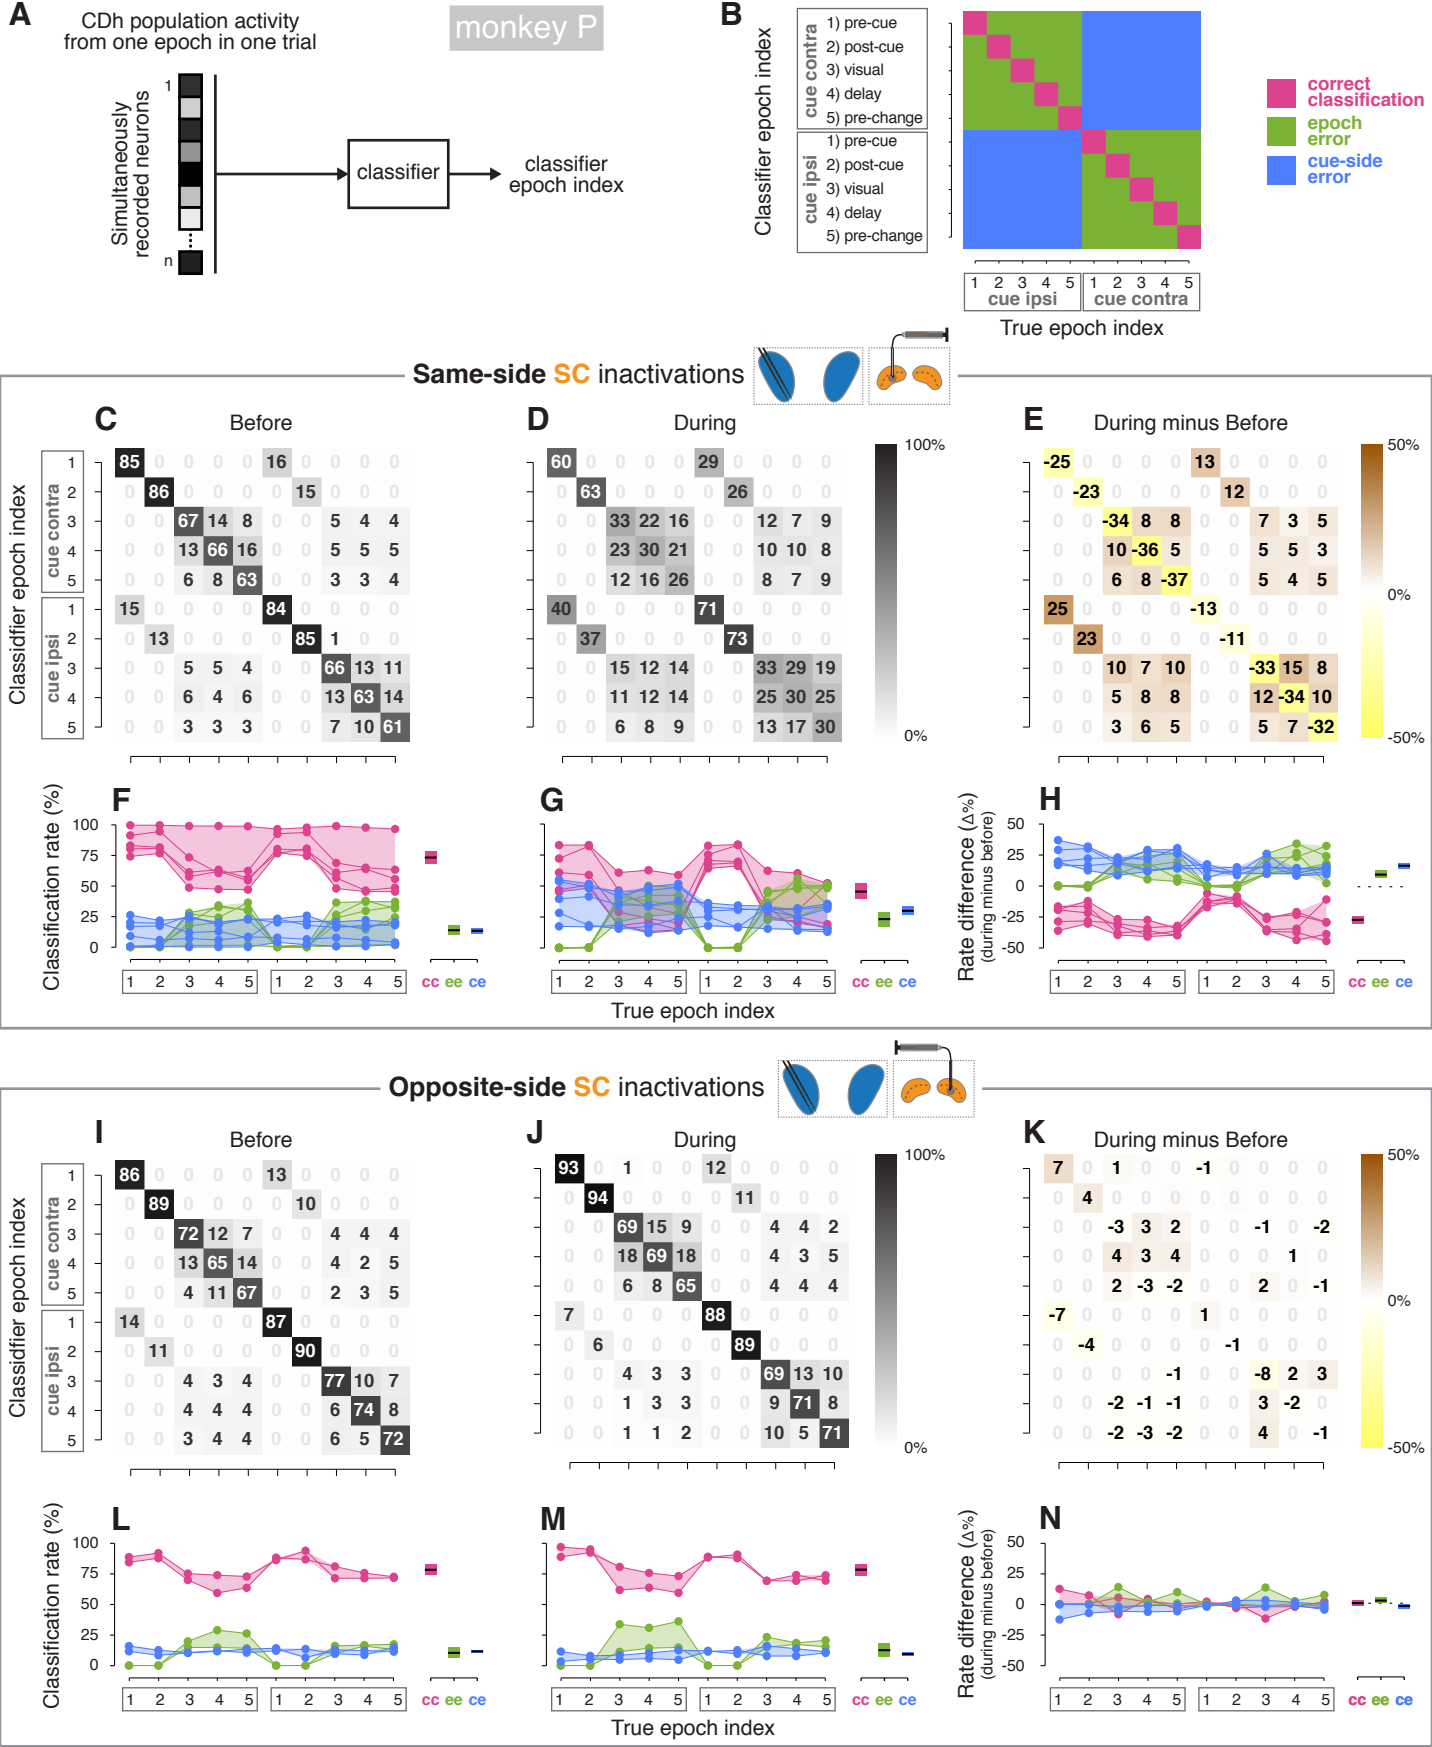

Supplement: supp [file elife_poa_e53998_Figure_6_figure_supplement_1.pdf › elife_poa_e53998_Figure_6_figure_supplement_1.pdf]

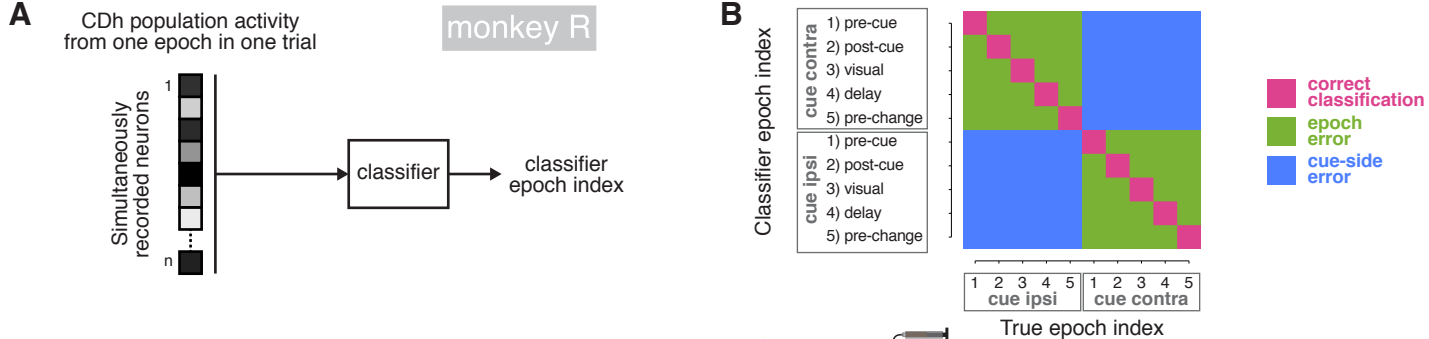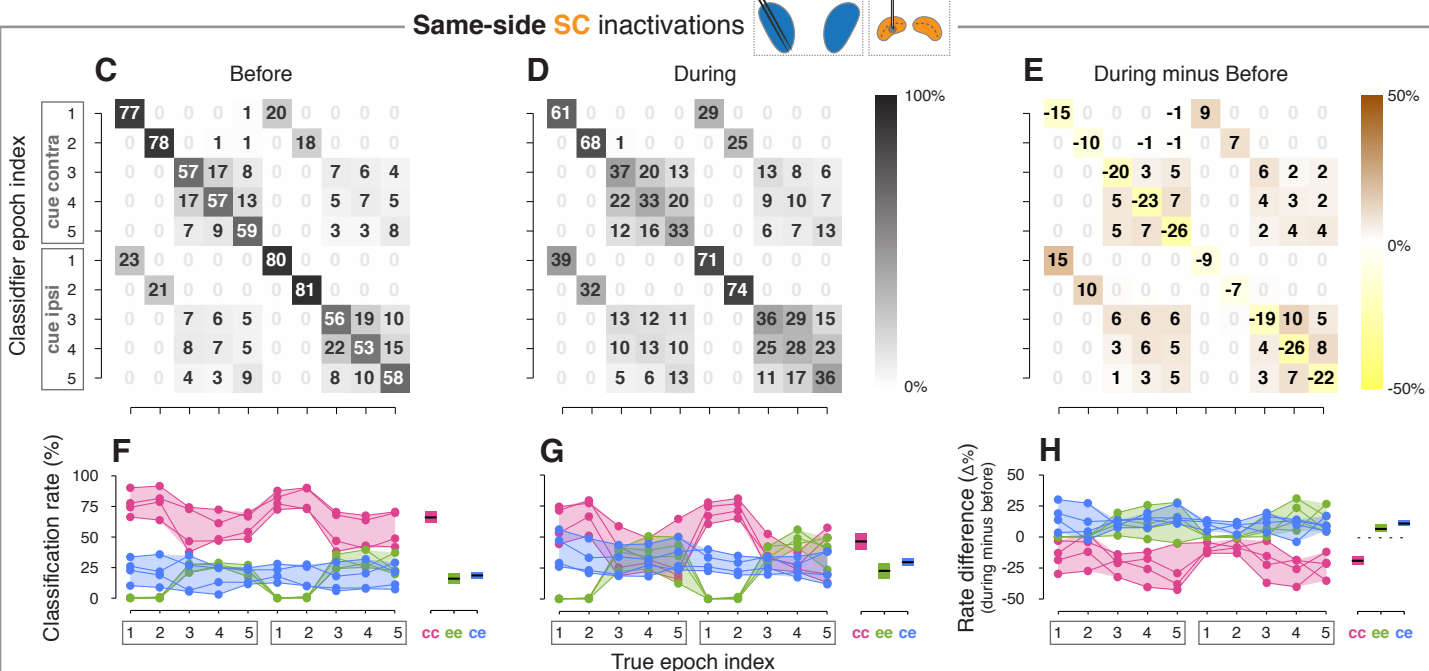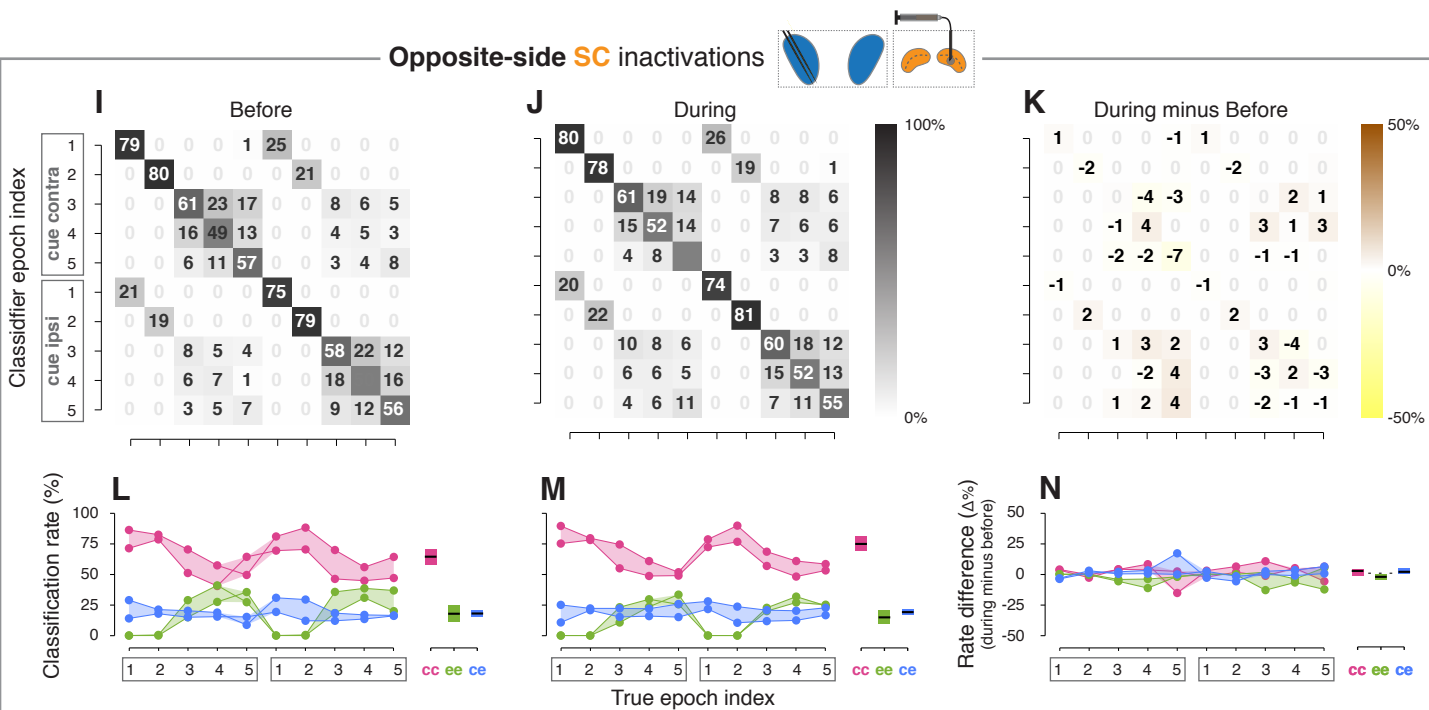

Supplement: supp [file elife_poa_e53998_Figure_6_figure_supplement_2.pdf › elife_poa_e53998_Figure_6_figure_supplement_2.pdf]
